# Supplementary material
Source: publisher figshare collection journal article supplement (https://acs.figshare.com/ndownloader/files/7608238)
Supplement: Supplementary file 1 [file 7608238]

 
data_f:\
 
_audit_creation_method            SHELXL-97 
_chemical_name_systematic 
; 
 ? 
; 
_chemical_name_common             ? 
_chemical_melting_point           ? 
_chemical_formula_moiety          ? 
_chemical_formula_sum 
 'C42 H52 Co2 Dy2 N4 O20' 
_chemical_formula_weight          1375.74 
 
loop_ 
 _atom_type_symbol 
 _atom_type_description 
 _atom_type_scat_dispersion_real 
 _atom_type_scat_dispersion_imag 
 _atom_type_scat_source 
 'C'  'C'   0.0033   0.0016 
 'International Tables Vol C Tables 4.2.6.8 and 6.1.1.4' 
 'H'  'H'   0.0000   0.0000 
 'International Tables Vol C Tables 4.2.6.8 and 6.1.1.4' 
 'N'  'N'   0.0061   0.0033 
 'International Tables Vol C Tables 4.2.6.8 and 6.1.1.4' 
 'O'  'O'   0.0106   0.0060 
 'International Tables Vol C Tables 4.2.6.8 and 6.1.1.4' 
 'Co'  'Co'   0.3494   0.9721 
 'International Tables Vol C Tables 4.2.6.8 and 6.1.1.4' 
 'Dy'  'Dy'  -0.1892   4.4098 
 'International Tables Vol C Tables 4.2.6.8 and 6.1.1.4' 
 
_symmetry_cell_setting            Triclinic 
_symmetry_space_group_name_H-M    P-1 
 
loop_ 
 _symmetry_equiv_pos_as_xyz 
 'x, y, z' 
 '-x, -y, -z' 
 
_cell_length_a                    10.127(2) 
_cell_length_b                    10.631(2) 
_cell_length_c                    11.017(2) 
_cell_angle_alpha                 90.13(3) 
_cell_angle_beta                  91.28(3) 
_cell_angle_gamma                 90.31(3) 
_cell_volume                      1185.8(4) 
_cell_formula_units_Z             1 
_cell_measurement_temperature     100(2) 
_cell_measurement_reflns_used     19162 
_cell_measurement_theta_min       2.70 
_cell_measurement_theta_max       27.88 
 
_exptl_crystal_description        plate 
_exptl_crystal_colour             green
_exptl_crystal_size_max           0.03 
_exptl_crystal_size_mid           0.02 
_exptl_crystal_size_min           0.01 
_exptl_crystal_density_meas       ? 
_exptl_crystal_density_diffrn     1.927 
_exptl_crystal_density_method     'not measured' 
_exptl_crystal_F_000              678 
_exptl_absorpt_coefficient_mu     3.885 
_exptl_absorpt_correction_type    multi-scan 
_exptl_absorpt_correction_T_min   0.8924 
_exptl_absorpt_correction_T_max   0.9622 
_exptl_absorpt_process_details    SADABS 
 
_exptl_special_details 
; 
 ? 
; 
 
_diffrn_ambient_temperature       100(2) 
_diffrn_radiation_wavelength      0.71079 
_diffrn_radiation_type            synchrotron
_diffrn_radiation_source          '3BM1 dipole'
_diffrn_radiation_monochromator   'double crystal'   
_diffrn_measurement_device_type   'synchrotron'  
_diffrn_measurement_method        'scans in phi'   
_diffrn_detector_area_resol_mean  ? 
_diffrn_standards_number          ? 
_diffrn_standards_interval_count  ? 
_diffrn_standards_interval_time   ? 
_diffrn_standards_decay_%         ? 
_diffrn_reflns_number             19162 
_diffrn_reflns_av_R_equivalents   0.0213 
_diffrn_reflns_av_sigmaI/netI     0.0186 
_diffrn_reflns_limit_h_min        -13 
_diffrn_reflns_limit_h_max        13 
_diffrn_reflns_limit_k_min        -13 
_diffrn_reflns_limit_k_max        13 
_diffrn_reflns_limit_l_min        -14 
_diffrn_reflns_limit_l_max        14 
_diffrn_reflns_theta_min          2.70 
_diffrn_reflns_theta_max          27.88 
_reflns_number_total              5035 
_reflns_number_gt                 4887 
_reflns_threshold_expression      >2sigma(I) 
 
_computing_data_collection        'Blu-Ice (McPhillips et al, 2002)' 
 
_computing_cell_refinement        'XDS (Kabsch, 1993)'     
_computing_data_reduction         'XDS (Kabsch, 1993)'     
_computing_structure_solution     'SHELXS-97 (Sheldrick, 1990)' 
_computing_structure_refinement   'SHELXL-97 (Sheldrick, 1997)' 
_computing_molecular_graphics     'X-SEED'    
_computing_publication_material   'XCIF V6.12 (BrukerAXS, 2001).' 
 
 
_refine_special_details 
; 
 Refinement of F^2^ against ALL reflections.  The weighted R-factor wR and 
 goodness of fit S are based on F^2^, conventional R-factors R are based 
 on F, with F set to zero for negative F^2^. The threshold expression of 
 F^2^ > 2sigma(F^2^) is used only for calculating R-factors(gt) etc. and is 
 not relevant to the choice of reflections for refinement.  R-factors based 
 on F^2^ are statistically about twice as large as those based on F, and R- 
 factors based on ALL data will be even larger.
The crystal was run on the Australian synchrotron in which we were restricted to only one 360 degree phi scan.
The asymmetric unit contains half the complex.
All non H-atoms are refined anisotropically. 
and all H-atoms are placed in calculated positions, except for the H toms of the OH bridging ligands which were found. 
; 
 
_refine_ls_structure_factor_coef  Fsqd  
_refine_ls_matrix_type            full 
_refine_ls_weighting_scheme       calc  
_refine_ls_weighting_details 
 'calc w=1/[\s^2^(Fo^2^)+(0.0436P)^2^+3.3216P] where P=(Fo^2^+2Fc^2^)/3' 
_atom_sites_solution_primary      direct 
_atom_sites_solution_secondary    difmap 
_atom_sites_solution_hydrogens    geom 
_refine_ls_hydrogen_treatment     mixed 
_refine_ls_extinction_method      none 
_refine_ls_extinction_coef        ? 
_refine_ls_number_reflns          5035 
_refine_ls_number_parameters      322 
_refine_ls_number_restraints      1 
_refine_ls_R_factor_all           0.0310 
_refine_ls_R_factor_gt            0.0302 
_refine_ls_wR_factor_ref          0.0803 
_refine_ls_wR_factor_gt           0.0798 
_refine_ls_goodness_of_fit_ref    1.042 
_refine_ls_restrained_S_all       1.042 
_refine_ls_shift/su_max           0.001 
_refine_ls_shift/su_mean          0.000 
 
loop_ 
 _atom_site_label 
 _atom_site_type_symbol 
 _atom_site_fract_x 
 _atom_site_fract_y 
 _atom_site_fract_z 
 _atom_site_U_iso_or_equiv 
 _atom_site_adp_type 
 _atom_site_occupancy 
 _atom_site_symmetry_multiplicity 
 _atom_site_calc_flag 
 _atom_site_refinement_flags 
 _atom_site_disorder_assembly 
 _atom_site_disorder_group 
Dy1 Dy 0.633316(16) 0.942820(15) 0.882666(13) 0.02655(7) Uani 1 1 d . . . 
Co2 Co 0.61386(5) 0.86935(5) 1.16773(4) 0.02469(11) Uani 1 1 d . . . 
O3 O 0.4960(3) 0.7778(3) 1.2696(2) 0.0303(5) Uani 1 1 d . . . 
O5 O 0.6747(3) 0.7063(2) 1.1176(2) 0.0305(5) Uani 1 1 d . . . 
O7 O 0.7357(3) 0.9496(3) 1.0655(2) 0.0287(5) Uani 1 1 d . . . 
O1 O 0.4847(3) 0.8828(2) 1.0366(2) 0.0264(5) Uani 1 1 d D . . 
O2 O 0.5553(3) 1.0270(2) 1.2267(2) 0.0280(5) Uani 1 1 d . . . 
O8 O 0.3058(3) 0.8812(3) 1.2321(2) 0.0333(6) Uani 1 1 d . . . 
O4 O 0.8609(3) 0.9169(3) 0.8215(2) 0.0353(6) Uani 1 1 d . . . 
O10 O 0.6676(3) 0.7283(3) 0.9148(2) 0.0374(6) Uani 1 1 d . . . 
O6 O 0.7122(3) 0.8674(3) 0.6849(3) 0.0373(6) Uani 1 1 d . . . 
N7 N 0.7523(3) 0.8780(3) 1.2950(3) 0.0315(7) Uani 1 1 d . . . 
N8 N 0.8337(3) 0.8880(4) 0.7112(3) 0.0358(7) Uani 1 1 d . . . 
O9 O 0.9193(3) 0.8841(4) 0.6346(3) 0.0514(8) Uani 1 1 d . . . 
C10 C 0.8625(4) 0.9638(5) 1.1197(4) 0.0408(10) Uani 1 1 d . . . 
H10A H 0.8755 1.0522 1.1461 0.049 Uiso 1 1 calc R . . 
H10B H 0.9305 0.9442 1.0594 0.049 Uiso 1 1 calc R . . 
C11 C 0.3721(4) 0.7964(4) 1.2812(3) 0.0303(7) Uani 1 1 d . . . 
C12 C 0.1984(4) 0.7555(4) 1.4303(4) 0.0361(8) Uani 1 1 d . . . 
H12 H 0.1714 0.8399 1.4169 0.043 Uiso 1 1 calc R . . 
C13 C 0.6931(4) 0.6679(4) 1.0095(4) 0.0327(8) Uani 1 1 d . . . 
C14 C 0.5942(5) 1.0392(5) 1.3499(4) 0.0408(10) Uani 1 1 d . . . 
H14A H 0.5366 0.9868 1.4010 0.049 Uiso 1 1 calc R . . 
H14B H 0.5860 1.1279 1.3761 0.049 Uiso 1 1 calc R . . 
C15 C 0.3401(4) 0.5805(4) 1.3791(4) 0.0421(10) Uani 1 1 d . . . 
C16 C 0.8785(4) 0.8790(5) 1.2260(4) 0.0429(10) Uani 1 1 d . . . 
H16A H 0.9522 0.9091 1.2792 0.051 Uiso 1 1 calc R . . 
H16B H 0.8992 0.7928 1.1983 0.051 Uiso 1 1 calc R . . 
C17 C 0.1323(4) 0.6822(5) 1.5143(4) 0.0430(10) Uani 1 1 d . . . 
H17 H 0.0628 0.7166 1.5602 0.052 Uiso 1 1 calc R . . 
C18 C 0.3032(4) 0.7075(4) 1.3659(3) 0.0329(8) Uani 1 1 d . . . 
C19 C 0.7462(5) 0.5371(4) 1.0001(4) 0.0438(10) Uani 1 1 d . . . 
C20 C 0.7348(5) 0.9975(5) 1.3642(4) 0.0484(11) Uani 1 1 d . . . 
H20A H 0.7948 1.0632 1.3330 0.058 Uiso 1 1 calc R . . 
H20B H 0.7569 0.9839 1.4512 0.058 Uiso 1 1 calc R . . 
C4 C 0.8320(5) 0.5025(5) 0.9074(5) 0.0494(11) Uani 1 1 d . . . 
C5 C 0.2693(5) 0.5083(5) 1.4610(5) 0.0533(13) Uani 1 1 d . . . 
H5 H 0.2902 0.4218 1.4702 0.064 Uiso 1 1 calc R . . 
C6 C 0.4447(5) 0.5176(5) 1.3049(6) 0.0530(13) Uani 1 1 d . . . 
H6A H 0.5323 0.5461 1.3332 0.080 Uiso 1 1 calc R . . 
H6B H 0.4318 0.5398 1.2192 0.080 Uiso 1 1 calc R . . 
H6C H 0.4379 0.4262 1.3141 0.080 Uiso 1 1 calc R . . 
C7 C 0.1697(5) 0.5587(5) 1.5292(5) 0.0517(12) Uani 1 1 d . . . 
H7 H 0.1266 0.5077 1.5871 0.062 Uiso 1 1 calc R . . 
C8 C 0.7024(6) 0.4467(5) 1.0839(5) 0.0542(13) Uani 1 1 d . . . 
H8 H 0.6448 0.4713 1.1464 0.065 Uiso 1 1 calc R . . 
C9 C 0.8740(7) 0.3773(5) 0.9041(5) 0.0615(15) Uani 1 1 d . . . 
H9 H 0.9352 0.3524 0.8446 0.074 Uiso 1 1 calc R . . 
C1 C 0.8851(7) 0.5950(6) 0.8158(6) 0.0695(18) Uani 1 1 d . . . 
H1A H 0.9668 0.5622 0.7821 0.104 Uiso 1 1 calc R . . 
H1B H 0.9033 0.6759 0.8558 0.104 Uiso 1 1 calc R . . 
H1C H 0.8195 0.6068 0.7501 0.104 Uiso 1 1 calc R . . 
C2 C 0.7425(6) 0.3221(5) 1.0761(6) 0.0578(13) Uani 1 1 d . . . 
H2 H 0.7117 0.2614 1.1320 0.069 Uiso 1 1 calc R . . 
C3 C 0.8279(7) 0.2883(5) 0.9861(6) 0.0628(15) Uani 1 1 d . . . 
H3 H 0.8556 0.2034 0.9797 0.075 Uiso 1 1 calc R . . 
C22 C 0.7552(5) 0.7685(4) 1.3769(4) 0.0438(10) Uani 1 1 d . . . 
H22A H 0.8334 0.7739 1.4308 0.066 Uiso 1 1 calc R . . 
H22B H 0.7587 0.6910 1.3288 0.066 Uiso 1 1 calc R . . 
H22C H 0.6755 0.7679 1.4257 0.066 Uiso 1 1 calc R . . 
H1 H 0.438(5) 0.813(3) 1.018(5) 0.053 Uiso 1 1 d D . . 
 
loop_ 
 _atom_site_aniso_label 
 _atom_site_aniso_U_11 
 _atom_site_aniso_U_22 
 _atom_site_aniso_U_33 
 _atom_site_aniso_U_23 
 _atom_site_aniso_U_13 
 _atom_site_aniso_U_12 
Dy1 0.02832(10) 0.03393(11) 0.01772(9) 0.00381(6) 0.00625(6) 0.00413(7) 
Co2 0.0259(2) 0.0304(2) 0.0179(2) 0.00318(18) 0.00463(17) 0.00068(18) 
O3 0.0298(12) 0.0358(13) 0.0253(12) 0.0052(11) 0.0041(10) -0.0021(11) 
O5 0.0347(13) 0.0314(13) 0.0256(12) 0.0041(10) 0.0055(11) 0.0035(11) 
O7 0.0282(12) 0.0372(13) 0.0209(11) 0.0058(10) 0.0052(10) 0.0006(10) 
O1 0.0283(12) 0.0317(12) 0.0193(11) 0.0015(10) 0.0030(9) -0.0010(10) 
O2 0.0315(12) 0.0335(13) 0.0191(11) 0.0011(10) 0.0017(10) 0.0020(11) 
O8 0.0318(13) 0.0408(14) 0.0278(13) 0.0083(11) 0.0086(11) 0.0027(11) 
O4 0.0318(13) 0.0498(16) 0.0245(12) 0.0024(12) 0.0042(11) 0.0058(12) 
O10 0.0493(17) 0.0376(14) 0.0255(13) 0.0002(11) 0.0066(12) 0.0090(13) 
O6 0.0346(14) 0.0515(17) 0.0261(13) -0.0015(12) 0.0046(11) 0.0065(13) 
N7 0.0335(16) 0.0387(16) 0.0224(14) 0.0044(13) 0.0038(12) 0.0011(14) 
N8 0.0320(16) 0.0504(19) 0.0254(15) 0.0004(14) 0.0072(13) 0.0052(15) 
O9 0.0444(18) 0.072(2) 0.0385(17) -0.0002(16) 0.0179(14) 0.0030(17) 
C10 0.0290(18) 0.060(3) 0.033(2) 0.0102(19) 0.0026(16) -0.0048(18) 
C11 0.0324(18) 0.0364(18) 0.0222(16) 0.0033(14) 0.0064(14) -0.0017(15) 
C12 0.0351(19) 0.043(2) 0.0300(18) 0.0059(17) 0.0047(16) 0.0005(17) 
C13 0.0352(19) 0.0321(18) 0.0309(18) -0.0012(15) 0.0055(15) 0.0042(15) 
C14 0.046(2) 0.052(2) 0.0248(18) -0.0082(17) -0.0012(17) 0.007(2) 
C15 0.039(2) 0.045(2) 0.043(2) 0.0119(19) 0.0098(18) 0.0020(18) 
C16 0.0319(19) 0.061(3) 0.035(2) 0.009(2) 0.0007(17) -0.0023(19) 
C17 0.036(2) 0.059(3) 0.034(2) 0.007(2) 0.0122(17) 0.0005(19) 
C18 0.0333(18) 0.041(2) 0.0249(17) 0.0090(15) 0.0041(15) -0.0032(16) 
C19 0.056(3) 0.038(2) 0.038(2) -0.0012(18) 0.005(2) 0.012(2) 
C20 0.056(3) 0.052(3) 0.037(2) -0.011(2) -0.012(2) 0.008(2) 
C4 0.059(3) 0.047(2) 0.043(2) -0.003(2) 0.007(2) 0.015(2) 
C5 0.053(3) 0.047(2) 0.061(3) 0.024(2) 0.016(2) 0.006(2) 
C6 0.051(3) 0.039(2) 0.070(3) 0.010(2) 0.022(3) 0.004(2) 
C7 0.049(3) 0.060(3) 0.048(3) 0.024(2) 0.016(2) -0.002(2) 
C8 0.067(3) 0.046(3) 0.050(3) 0.007(2) 0.012(2) 0.013(2) 
C9 0.079(4) 0.051(3) 0.055(3) -0.009(2) 0.008(3) 0.025(3) 
C1 0.081(4) 0.060(3) 0.069(4) 0.001(3) 0.038(3) 0.019(3) 
C2 0.067(3) 0.044(3) 0.062(3) 0.006(2) 0.000(3) 0.001(2) 
C3 0.080(4) 0.045(3) 0.064(3) -0.001(2) -0.001(3) 0.020(3) 
C22 0.050(2) 0.047(2) 0.035(2) 0.0148(19) -0.0063(19) 0.002(2) 
 
_geom_special_details 
; 
 All esds (except the esd in the dihedral angle between two l.s. planes) 
 are estimated using the full covariance matrix.  The cell esds are taken 
 into account individually in the estimation of esds in distances, angles 
 and torsion angles; correlations between esds in cell parameters are only 
 used when they are defined by crystal symmetry.  An approximate (isotropic) 
 treatment of cell esds is used for estimating esds involving l.s. planes. 
; 
 
loop_ 
 _geom_bond_atom_site_label_1 
 _geom_bond_atom_site_label_2 
 _geom_bond_distance 
 _geom_bond_site_symmetry_2 
 _geom_bond_publ_flag 
Dy1 O7 2.245(3) . ? 
Dy1 O2 2.260(3) 2_677 ? 
Dy1 O10 2.335(3) . ? 
Dy1 O8 2.347(3) 2_677 ? 
Dy1 O1 2.378(2) . ? 
Dy1 O1 2.392(3) 2_677 ? 
Dy1 O4 2.433(3) . ? 
Dy1 O6 2.470(3) . ? 
Dy1 N8 2.865(3) . ? 
Co2 O7 1.890(3) . ? 
Co2 O2 1.899(3) . ? 
Co2 O3 1.919(3) . ? 
Co2 O5 1.926(3) . ? 
Co2 O1 1.933(3) . ? 
Co2 N7 1.962(3) . ? 
Co2 Dy1 3.2493(11) 2_677 ? 
O3 C11 1.281(5) . ? 
O5 C13 1.276(5) . ? 
O7 C10 1.412(5) . ? 
O1 Dy1 2.392(3) 2_677 ? 
O1 H1 0.905(10) . ? 
O2 C14 1.411(5) . ? 
O2 Dy1 2.260(3) 2_677 ? 
O8 C11 1.245(5) . ? 
O8 Dy1 2.347(3) 2_677 ? 
O4 N8 1.276(4) . ? 
O10 C13 1.250(5) . ? 
O6 N8 1.276(5) . ? 
N7 C22 1.474(5) . ? 
N7 C20 1.493(6) . ? 
N7 C16 1.501(5) . ? 
N8 O9 1.224(4) . ? 
C10 C16 1.486(6) . ? 
C10 H10A 0.9900 . ? 
C10 H10B 0.9900 . ? 
C11 C18 1.509(5) . ? 
C12 C18 1.389(6) . ? 
C12 C17 1.392(6) . ? 
C12 H12 0.9500 . ? 
C13 C19 1.497(5) . ? 
C14 C20 1.499(7) . ? 
C14 H14A 0.9900 . ? 
C14 H14B 0.9900 . ? 
C15 C5 1.394(6) . ? 
C15 C18 1.410(6) . ? 
C15 C6 1.510(6) . ? 
C16 H16A 0.9900 . ? 
C16 H16B 0.9900 . ? 
C17 C7 1.378(7) . ? 
C17 H17 0.9500 . ? 
C19 C4 1.405(6) . ? 
C19 C8 1.410(7) . ? 
C20 H20A 0.9900 . ? 
C20 H20B 0.9900 . ? 
C4 C9 1.401(7) . ? 
C4 C1 1.516(8) . ? 
C5 C7 1.381(7) . ? 
C5 H5 0.9500 . ? 
C6 H6A 0.9800 . ? 
C6 H6B 0.9800 . ? 
C6 H6C 0.9800 . ? 
C7 H7 0.9500 . ? 
C8 C2 1.390(7) . ? 
C8 H8 0.9500 . ? 
C9 C3 1.395(9) . ? 
C9 H9 0.9500 . ? 
C1 H1A 0.9800 . ? 
C1 H1B 0.9800 . ? 
C1 H1C 0.9800 . ? 
C2 C3 1.379(9) . ? 
C2 H2 0.9500 . ? 
C3 H3 0.9500 . ? 
C22 H22A 0.9800 . ? 
C22 H22B 0.9800 . ? 
C22 H22C 0.9800 . ? 
 
loop_ 
 _geom_angle_atom_site_label_1 
 _geom_angle_atom_site_label_2 
 _geom_angle_atom_site_label_3 
 _geom_angle 
 _geom_angle_site_symmetry_1 
 _geom_angle_site_symmetry_3 
 _geom_angle_publ_flag 
O7 Dy1 O2 147.32(9) . 2_677 ? 
O7 Dy1 O10 80.02(11) . . ? 
O2 Dy1 O10 110.26(11) 2_677 . ? 
O7 Dy1 O8 109.87(10) . 2_677 ? 
O2 Dy1 O8 79.86(10) 2_677 2_677 ? 
O10 Dy1 O8 145.15(10) . 2_677 ? 
O7 Dy1 O1 69.78(9) . . ? 
O2 Dy1 O1 83.04(9) 2_677 . ? 
O10 Dy1 O1 74.07(10) . . ? 
O8 Dy1 O1 140.75(9) 2_677 . ? 
O7 Dy1 O1 82.50(9) . 2_677 ? 
O2 Dy1 O1 70.13(9) 2_677 2_677 ? 
O10 Dy1 O1 140.98(9) . 2_677 ? 
O8 Dy1 O1 73.80(9) 2_677 2_677 ? 
O1 Dy1 O1 67.19(10) . 2_677 ? 
O7 Dy1 O4 80.25(9) . . ? 
O2 Dy1 O4 131.62(9) 2_677 . ? 
O10 Dy1 O4 77.80(11) . . ? 
O8 Dy1 O4 71.49(10) 2_677 . ? 
O1 Dy1 O4 141.71(9) . . ? 
O1 Dy1 O4 132.76(10) 2_677 . ? 
O7 Dy1 O6 130.40(9) . . ? 
O2 Dy1 O6 82.18(9) 2_677 . ? 
O10 Dy1 O6 76.50(10) . . ? 
O8 Dy1 O6 71.91(10) 2_677 . ? 
O1 Dy1 O6 139.85(10) . . ? 
O1 Dy1 O6 138.96(9) 2_677 . ? 
O4 Dy1 O6 52.45(10) . . ? 
O7 Dy1 N8 106.12(10) . . ? 
O2 Dy1 N8 106.36(9) 2_677 . ? 
O10 Dy1 N8 78.10(11) . . ? 
O8 Dy1 N8 67.06(10) 2_677 . ? 
O1 Dy1 N8 152.17(10) . . ? 
O1 Dy1 N8 140.57(10) 2_677 . ? 
O4 Dy1 N8 26.30(10) . . ? 
O6 Dy1 N8 26.37(10) . . ? 
O7 Co2 O2 91.16(12) . . ? 
O7 Co2 O3 176.27(12) . . ? 
O2 Co2 O3 92.48(12) . . ? 
O7 Co2 O5 90.93(12) . . ? 
O2 Co2 O5 176.67(11) . . ? 
O3 Co2 O5 85.40(12) . . ? 
O7 Co2 O1 87.62(11) . . ? 
O2 Co2 O1 88.52(11) . . ? 
O3 Co2 O1 93.32(11) . . ? 
O5 Co2 O1 94.15(12) . . ? 
O7 Co2 N7 86.66(13) . . ? 
O2 Co2 N7 86.73(13) . . ? 
O3 Co2 N7 92.69(13) . . ? 
O5 Co2 N7 90.81(13) . . ? 
O1 Co2 N7 172.49(13) . . ? 
O7 Co2 Dy1 97.51(8) . 2_677 ? 
O2 Co2 Dy1 42.78(8) . 2_677 ? 
O3 Co2 Dy1 85.75(8) . 2_677 ? 
O5 Co2 Dy1 139.35(9) . 2_677 ? 
O1 Co2 Dy1 46.96(8) . 2_677 ? 
N7 Co2 Dy1 129.19(10) . 2_677 ? 
C11 O3 Co2 127.0(2) . . ? 
C13 O5 Co2 127.6(2) . . ? 
C10 O7 Co2 113.2(2) . . ? 
C10 O7 Dy1 141.2(2) . . ? 
Co2 O7 Dy1 103.18(12) . . ? 
Co2 O1 Dy1 97.23(10) . . ? 
Co2 O1 Dy1 96.83(11) . 2_677 ? 
Dy1 O1 Dy1 112.81(10) . 2_677 ? 
Co2 O1 H1 117(4) . . ? 
Dy1 O1 H1 113(4) . . ? 
Dy1 O1 H1 117(4) 2_677 . ? 
C14 O2 Co2 108.9(2) . . ? 
C14 O2 Dy1 135.6(2) . 2_677 ? 
Co2 O2 Dy1 102.43(12) . 2_677 ? 
C11 O8 Dy1 132.0(2) . 2_677 ? 
N8 O4 Dy1 96.1(2) . . ? 
C13 O10 Dy1 131.3(3) . . ? 
N8 O6 Dy1 94.3(2) . . ? 
C22 N7 C20 111.1(3) . . ? 
C22 N7 C16 107.9(3) . . ? 
C20 N7 C16 111.5(4) . . ? 
C22 N7 Co2 114.1(3) . . ? 
C20 N7 Co2 108.0(3) . . ? 
C16 N7 Co2 103.9(2) . . ? 
O9 N8 O6 122.2(4) . . ? 
O9 N8 O4 121.6(4) . . ? 
O6 N8 O4 116.2(3) . . ? 
O9 N8 Dy1 170.1(3) . . ? 
O6 N8 Dy1 59.30(17) . . ? 
O4 N8 Dy1 57.61(17) . . ? 
O7 C10 C16 110.7(3) . . ? 
O7 C10 H10A 109.5 . . ? 
C16 C10 H10A 109.5 . . ? 
O7 C10 H10B 109.5 . . ? 
C16 C10 H10B 109.5 . . ? 
H10A C10 H10B 108.1 . . ? 
O8 C11 O3 126.3(3) . . ? 
O8 C11 C18 118.2(3) . . ? 
O3 C11 C18 115.5(3) . . ? 
C18 C12 C17 121.1(4) . . ? 
C18 C12 H12 119.4 . . ? 
C17 C12 H12 119.4 . . ? 
O10 C13 O5 125.6(4) . . ? 
O10 C13 C19 119.4(4) . . ? 
O5 C13 C19 115.0(3) . . ? 
O2 C14 C20 108.6(3) . . ? 
O2 C14 H14A 110.0 . . ? 
C20 C14 H14A 110.0 . . ? 
O2 C14 H14B 110.0 . . ? 
C20 C14 H14B 110.0 . . ? 
H14A C14 H14B 108.4 . . ? 
C5 C15 C18 117.0(4) . . ? 
C5 C15 C6 118.9(4) . . ? 
C18 C15 C6 124.0(4) . . ? 
C10 C16 N7 108.8(3) . . ? 
C10 C16 H16A 109.9 . . ? 
N7 C16 H16A 109.9 . . ? 
C10 C16 H16B 109.9 . . ? 
N7 C16 H16B 109.9 . . ? 
H16A C16 H16B 108.3 . . ? 
C7 C17 C12 118.5(4) . . ? 
C7 C17 H17 120.7 . . ? 
C12 C17 H17 120.7 . . ? 
C12 C18 C15 120.5(4) . . ? 
C12 C18 C11 117.0(4) . . ? 
C15 C18 C11 122.6(4) . . ? 
C4 C19 C8 120.3(4) . . ? 
C4 C19 C13 121.6(4) . . ? 
C8 C19 C13 118.0(4) . . ? 
N7 C20 C14 109.0(4) . . ? 
N7 C20 H20A 109.9 . . ? 
C14 C20 H20A 109.9 . . ? 
N7 C20 H20B 109.9 . . ? 
C14 C20 H20B 109.9 . . ? 
H20A C20 H20B 108.3 . . ? 
C9 C4 C19 117.6(5) . . ? 
C9 C4 C1 119.2(5) . . ? 
C19 C4 C1 123.2(4) . . ? 
C7 C5 C15 122.0(5) . . ? 
C7 C5 H5 119.0 . . ? 
C15 C5 H5 119.0 . . ? 
C15 C6 H6A 109.5 . . ? 
C15 C6 H6B 109.5 . . ? 
H6A C6 H6B 109.5 . . ? 
C15 C6 H6C 109.5 . . ? 
H6A C6 H6C 109.5 . . ? 
H6B C6 H6C 109.5 . . ? 
C17 C7 C5 120.7(4) . . ? 
C17 C7 H7 119.7 . . ? 
C5 C7 H7 119.7 . . ? 
C2 C8 C19 120.9(5) . . ? 
C2 C8 H8 119.6 . . ? 
C19 C8 H8 119.6 . . ? 
C3 C9 C4 121.5(5) . . ? 
C3 C9 H9 119.3 . . ? 
C4 C9 H9 119.3 . . ? 
C4 C1 H1A 109.5 . . ? 
C4 C1 H1B 109.5 . . ? 
H1A C1 H1B 109.5 . . ? 
C4 C1 H1C 109.5 . . ? 
H1A C1 H1C 109.5 . . ? 
H1B C1 H1C 109.5 . . ? 
C3 C2 C8 118.9(5) . . ? 
C3 C2 H2 120.5 . . ? 
C8 C2 H2 120.5 . . ? 
C2 C3 C9 120.8(5) . . ? 
C2 C3 H3 119.6 . . ? 
C9 C3 H3 119.6 . . ? 
N7 C22 H22A 109.5 . . ? 
N7 C22 H22B 109.5 . . ? 
H22A C22 H22B 109.5 . . ? 
N7 C22 H22C 109.5 . . ? 
H22A C22 H22C 109.5 . . ? 
H22B C22 H22C 109.5 . . ? 
 
_diffrn_measured_fraction_theta_max    0.890 
_diffrn_reflns_theta_full              27.88 
_diffrn_measured_fraction_theta_full   0.890 
_refine_diff_density_max    1.426 
_refine_diff_density_min   -1.639 
_refine_diff_density_rms    0.109 
